# Supplementary material for: SmpB and tmRNA Orchestrate Purine Pathway for the Trimethoprim Resistance in Aeromonas veronii
Source: Front Cell Infect Microbiol. 2020 May 25;10:239. doi: 10.3389/fcimb.2020.00239 (PMC7270562; doi:10.3389/fcimb.2020.00239)
Supplement: Supplementary file 1 [file Table_1.xlsx]

## Sheet: Sheet1
Supplementary Table 1 The MIC value of the strains treated by TMP and metabolites
Treatment	MIC(mg/mL)
	WT	△smpB	△ssrA	△smpB::smpB	△sarA::ssrA
TMP	16	8	8	16	16
TMP+1mM adenosine	8	2	4	8	8
TMP+1mM Guanosine	8	8	4	8	8
TMP+10mM ATP	8	4	8	8	8
